# Supplementary material
Source: HighWire-hosted journal article supplement (https://bmjpaedsopen.bmj.com/content/7/1/e001839)
Supplement: inline-supplementary-material-1 [file inline-supplementary-material-1.pdf]

|       |                      | Risk of bias |    |    |    |    |    |    |    |    |     |     |     | Overall |
|-------|----------------------|--------------|----|----|----|----|----|----|----|----|-----|-----|-----|---------|
|       |                      | D1           | D2 | D3 | D4 | D5 | D6 | D7 | D8 | D9 | D10 | D11 | D12 |         |
| Study | Zahra et al.         | +            | +  | +  | -  | +  | +  | +  | +  | +  | +   | +   | +   |         |
|       | El-Husseiny et al.   | +            | +  | +  | +  | -  | +  | +  | +  | +  | +   | +   | +   |         |
|       | Chauhan et al        | +            | +  | +  | +  | -  | +  | +  | +  | +  | +   | +   | +   |         |
|       | Martin et al         | +            | -  | +  | -  | +  | +  | +  | +  | +  | +   | +   | +   |         |
|       | Cavalcante et al     | +            | +  | +  | +  | +  | +  | +  | +  | +  | +   | +   | +   |         |
|       | Farajzadeh et al     | +            | +  | +  | +  | +  | +  | +  | +  | +  | +   | +   | +   |         |
|       | Agarwal et al        | +            | +  | +  | -  | +  | +  | +  | +  | +  | +   | +   | +   |         |
|       | Lin et al            | +            | -  | +  | +  | +  | +  | +  | +  | +  | +   | +   | +   |         |
|       | Mazereeuw et al      | +            | +  | -  | +  | -  | +  | +  | +  | +  | +   | +   | +   |         |
|       | Handa et al          | +            | +  | +  | +  | +  | +  | +  | +  | +  | +   | +   | +   |         |
|       | Cho et al            | +            | +  | +  | -  | +  | +  | +  | +  | +  | +   | +   | +   |         |
|       | Hann et al           | +            | +  | -  | +  | +  | +  | +  | +  | +  | +   | +   | +   |         |
|       | Nicolaidou et al     | +            | +  | +  | +  | +  | +  | +  | +  | +  | +   | +   | +   |         |
|       | Khitam Al-Refu et al | +            | +  | -  | +  | +  | +  | +  | +  | +  | +   | +   | +   |         |
|       | Manik chandra et al  | +            | +  | +  | +  | +  | +  | +  | +  | +  | +   | +   | +   |         |
|       | Rebutm et al         | +            | -  | +  | -  | +  | +  | +  | +  | +  | +   | +   | +   |         |
|       | Al-Mutair et al      | +            | +  | +  | -  | +  | +  | +  | +  | +  | +   | +   | +   |         |

Judgement

High

Unclear

Low

Not applicable

D1. Was the research question or objective in this paper clearly stated and appropriate?

D2. Was the study population clearly specified and defined?

D3. Did the authors include a sample size justification?

D4. Were controls selected or recruited from the same or similar population that gave rise to the cases (including the same timeframe)?

D5. Were the definitions, inclusion and exclusion criteria, algorithms or processes used to identify or select cases and controls valid, reliable, and implemented consistently across all study participants?

D6. Were the cases clearly defined and differentiated from controls?

D7. If less than 100 percent of eligible cases and/or controls were selected for the study, were the cases and/or controls randomly selected from those eligible?

D8. Was there use of concurrent controls?

D9. Were the investigators able to confirm that the exposure/risk occurred prior to the development of the condition or event that defined a participant as a case?

D10. Were the measures of exposure/risk clearly defined, valid, reliable, and implemented consistently (including the same time period) across all study participants?

D11. Were the assessors of exposure/risk blinded to the case or control status of participants?

D12. Were key potential confounding variables measured and adjusted statistically in the analyses? If matching was used, did the investigators account for matching during study analysis?
